# Supplementary material for: Disulfiram attenuates hypoxia-induced pulmonary hypertension by inhibiting GSDMD cleavage and pyroptosis in HPASMCs
Source: PubMed Central journal article supplement (PMC9756478; doi:10.1186/s12931-022-02279-0), 2022-12-16
Supplement: 12931_2022_2279_MOESM1_ESM.pdf [file 12931_2022_2279_MOESM1_ESM.pdf]

**Table S1. Clinical information of PAH subjects and controls in the study**

| Patient | Gender | Age, y | Condition | Right Heart Catheterization<br>(mmHg) |     |     |     |       | PVR | SVR  |  |
|---------|--------|--------|-----------|---------------------------------------|-----|-----|-----|-------|-----|------|--|
|         |        |        |           |                                       |     |     | mPA |       |     |      |  |
|         |        |        |           | CVP                                   | RAP | RVP | P   | mPAWP |     |      |  |
| 1       | Male   | 77     | Control   | 7                                     | 7   | 8   | 17  | 21    | 13  | 3.1  |  |
| 2       | Female | 70     | Control   | 9                                     | 9   | 10  | 13  | 22    | 8   | 2.91 |  |
| 3       | Male   | 60     | PAH       | 27                                    | 27  | 27  | 37  | 42    | 32  | 2.07 |  |
| 4       | Female | 78     | Control   | 7                                     | 7   | 8   | 14  | 19    | 9   | 2.9  |  |
| 5       | Male   | 68     | Control   | 5                                     | 5   | 5   | 13  | 16    | 11  | 3.12 |  |
| 6       | Male   | 79     | PAH       | 9                                     | 9   | 10  | 20  | 25    | 15  | 3.1  |  |
| 7       | Female | 45     | PAH       | 22                                    | 22  | 23  | 47  | 54    | 19  | 3.61 |  |
| 8       | Male   | 59     | Control   | 17                                    | 17  | 15  | 31  | 40    | 29  | 3.34 |  |
| 9       | Male   | 76     | PAH       | 10                                    | 10  | 8   | 14  | 21    | 14  | 2.72 |  |
| 10      | Female | 69     | Control   | 7                                     | 7   | 6   | 12  | 19    | 7   | 2.97 |  |
| 11      | Male   | 49     | PAH       | 12                                    | 12  | 15  | 21  | 21    | 15  | NA   |  |
| 12      | Male   | 82     | Control   | 5                                     | 5   | 5   | 12  | 16    | 12  | 3.38 |  |
| 13      | Male   | 67     | Control   | 1                                     | 1   | 1   | 5   | 9     | 4   | 3.05 |  |
| 14      | Male   | 57     | Control   | 5                                     | 5   | 4   | 14  | 16    | 14  | 4.17 |  |
| 15      | Male   | 75     | PAH       | 9                                     | 9   | 8   | 21  | 26    | 14  | 3.12 |  |
| 16      | Female | 61     | Control   | 2                                     | 2   | 2   | NA  | 18    | 8   | 4.24 |  |
| 17      | Male   | 57     | PAH       | 9                                     | 9   | 11  | 17  | 22    | 15  | 3.13 |  |
| 18      | Female | 57     | Control   | 6                                     | 6   | 7   | 13  | 16    | 9   | 2    |  |
| 19      | Male   | 34     | PAH       | 14                                    | 14  | 11  | 26  | 33    | 19  | 3.16 |  |
| 20      | Female | 53     | PAH       | 6                                     | 6   | 8   | 20  | 28    | 9   | 3.14 |  |
| 21      | Female | 60     | PAH       | 5                                     | 5   | 5   | 18  | 27    | 12  | 3.31 |  |
| 22      | Female | 38     | Control   | 7                                     | 7   | 8   | 13  | 16    | 12  | 2.9  |  |
| 23      | Female | 53     | PAH       | 4                                     | 4   | NA  | NA  | 36    | NA  | NA   |  |
| 24      | Female | 66     | PAH       | 5                                     | 5   | NA  | NA  | 60    | 12  | 2.01 |  |
| 25      | Female | 59     | Control   | 10                                    | 10  | NA  | 8   | 18    | 14  | 2.8  |  |
| 26      | Male   | 56     | PAH       | 7                                     | 7   | 4   | 18  | 26    | 9   | 4.01 |  |
| 27      | Female | 74     | Control   | 6                                     | 6   | NA  | NA  | 18    | 12  | 3.24 |  |
| 28      | Male   | 81     | Control   | 10                                    | 10  | NA  | 21  | 21    | 12  | 3.44 |  |
| 29      | Male   | 64     | Control   | 3                                     | 3   | NA  | NA  | 15    | 11  | 5.04 |  |
| 30      | Male   | 58     | PAH       | 8                                     | 8   | 10  | NA  | 28    | NA  | NA   |  |

Abbreviations: CVP, central venous pressure; RAP, right atrial pressure; RVP, right ventricular pressure; mPAP; mean pulmonary artery pressure; mPAWP, mean pulmonary capillary wedge pressure; PVR, pulmonary vascular resistance; SVR, systemic vascular resistance.

**Table S2: Gene set enrichment analysis details**

| <b>Gene symbol</b> | <b>Rank in gene list</b> | <b>Rank metric score</b> | <b>Running ES</b> | <b>Core enrichment</b> |
|--------------------|--------------------------|--------------------------|-------------------|------------------------|
| <i>MMP1</i>        | 162                      | 0.303                    | 0.0481            | Yes                    |
| <i>AIM2</i>        | 238                      | 0.272                    | 0.0955            | Yes                    |
| <i>CHMP4C</i>      | 266                      | 0.266                    | 0.1445            | Yes                    |
| <i>CASP8</i>       | 275                      | 0.264                    | 0.1943            | Yes                    |
| <i>NLRC4</i>       | 281                      | 0.262                    | 0.244             | Yes                    |
| <i>CHMP2B</i>      | 709                      | 0.193                    | 0.2554            | Yes                    |
| <i>NLRP3</i>       | 844                      | 0.18                     | 0.2817            | Yes                    |
| <i>GBP3</i>        | 922                      | 0.172                    | 0.31              | Yes                    |
| <i>HMGB1</i>       | 945                      | 0.171                    | 0.3412            | Yes                    |
| <i>GBP5</i>        | 950                      | 0.171                    | 0.3735            | Yes                    |
| <i>GBP2</i>        | 1281                     | 0.148                    | 0.382             | Yes                    |
| <i>TLR5</i>        | 1347                     | 0.144                    | 0.4057            | Yes                    |
| <i>GBP1</i>        | 1475                     | 0.137                    | 0.4243            | Yes                    |
| <i>IL1A</i>        | 1611                     | 0.13                     | 0.4411            | Yes                    |
| <i>MEFV</i>        | 1722                     | 0.125                    | 0.4583            | Yes                    |
| <i>BTK</i>         | 1760                     | 0.123                    | 0.4796            | Yes                    |
| <i>GBP4</i>        | 1800                     | 0.121                    | 0.5004            | Yes                    |
| <i>CARD18</i>      | 1939                     | 0.116                    | 0.5142            | Yes                    |
| <i>IL1B</i>        | 2021                     | 0.112                    | 0.5307            | Yes                    |
| <i>VSIG4</i>       | 2228                     | 0.104                    | 0.5382            | Yes                    |
| <i>PYDC1</i>       | 2858                     | 0.086                    | 0.5171            | Yes                    |
| <i>TLR8</i>        | 3040                     | 0.082                    | 0.5219            | Yes                    |
| <i>TLR1</i>        | 3093                     | 0.081                    | 0.5342            | Yes                    |
| <i>CASP4</i>       | 3621                     | 0.069                    | 0.5159            | Yes                    |
| <i>CASP3</i>       | 3814                     | 0.065                    | 0.5169            | Yes                    |
| <i>MMP9</i>        | 3855                     | 0.064                    | 0.5268            | Yes                    |
| <i>CHMP3</i>       | 4129                     | 0.059                    | 0.5219            | Yes                    |
| <i>TLR2</i>        | 4209                     | 0.058                    | 0.5282            | Yes                    |
| <i>IL18</i>        | 4285                     | 0.056                    | 0.5345            | Yes                    |
| <i>DDX3X</i>       | 4438                     | 0.054                    | 0.5358            | Yes                    |
| <i>NLRP2</i>       | 4568                     | 0.052                    | 0.538             | Yes                    |
| <i>TLR4</i>        | 4792                     | 0.048                    | 0.5339            | Yes                    |
| <i>TREM2</i>       | 4846                     | 0.048                    | 0.5398            | Yes                    |
| <i>DHX9</i>        | 4902                     | 0.047                    | 0.5455            | Yes                    |
| <i>TLR6</i>        | 4953                     | 0.046                    | 0.5513            | Yes                    |
| <i>IRF2</i>        | 5138                     | 0.043                    | 0.5486            | No                     |
| <i>GSDMC</i>       | 5295                     | 0.041                    | 0.547             | No                     |

|                 |       |        |        |    |
|-----------------|-------|--------|--------|----|
| <i>CASP1</i>    | 5420  | 0.039  | 0.5471 | No |
| <i>TLR3</i>     | 5576  | 0.037  | 0.5449 | No |
| <i>CHMP2A</i>   | 5897  | 0.033  | 0.5321 | No |
| <i>TXNIP</i>    | 6642  | 0.023  | 0.4921 | No |
| <i>CHMP7</i>    | 6645  | 0.022  | 0.4963 | No |
| <i>BAK1</i>     | 6940  | 0.019  | 0.4824 | No |
| <i>TLR9</i>     | 7098  | 0.017  | 0.4763 | No |
| <i>CTSG</i>     | 7164  | 0.016  | 0.4756 | No |
| <i>CHMP6</i>    | 7878  | 0.008  | 0.4346 | No |
| <i>CFLAR</i>    | 8087  | 0.005  | 0.4233 | No |
| <i>PYCARD</i>   | 8097  | 0.005  | 0.4237 | No |
| <i>CASP6</i>    | 8099  | 0.005  | 0.4246 | No |
| <i>CASP5</i>    | 8100  | 0.005  | 0.4256 | No |
| <i>TNFRSF21</i> | 8264  | 0.003  | 0.4165 | No |
| <i>CHMP4A</i>   | 8553  | 0      | 0.3994 | No |
| <i>ZBP1</i>     | 8581  | 0      | 0.3978 | No |
| <i>CYCS</i>     | 8676  | -0.001 | 0.3925 | No |
| <i>GSDMD</i>    | 9188  | -0.007 | 0.3634 | No |
| <i>IRF1</i>     | 9936  | -0.015 | 0.3219 | No |
| <i>NLRP12</i>   | 10121 | -0.017 | 0.3143 | No |
| <i>CARD8</i>    | 10207 | -0.018 | 0.3127 | No |
| <i>BAX</i>      | 10343 | -0.02  | 0.3085 | No |
| <i>CHMP4B</i>   | 10388 | -0.021 | 0.3098 | No |
| <i>APIP</i>     | 10591 | -0.023 | 0.3021 | No |
| <i>NAIP</i>     | 10904 | -0.027 | 0.2886 | No |
| <i>SERPINB1</i> | 11432 | -0.033 | 0.2635 | No |
| <i>CARD16</i>   | 12140 | -0.042 | 0.2295 | No |
| <i>GSDMA</i>    | 14586 | -0.09  | 0.101  | No |
| <i>GSDMB</i>    | 14620 | -0.091 | 0.1163 | No |
| <i>NLRP7</i>    | 14643 | -0.091 | 0.1324 | No |

---
